# Supplementary material for: Adaptive upregulation of DNA repair genes following benzo(a)pyrene diol epoxide protects against cell death at the expense of mutations
Source: PubMed Central journal article supplement — Nucleic Acids Res. 2016 Sep 30;44(22):10727–43. doi: 10.1093/nar/gkw873 (PMC5159553; doi:10.1093/nar/gkw873), 2016-09-30
Supplement: supp_gkw873_nar-00726-d-2016-File012.pdf [file supp_gkw873_nar-00726-d-2016-File012.pdf]

| <b>gene</b> | <b>Primer sequence</b>     |
|-------------|----------------------------|
| DDB2-up     | GGGGCTCCAGCAGTCCTTTTT      |
| DDB2-low    | GGGCCACATGCGTCACTTTCTTTT   |
| XPC-up      | CTTTGATTTCCATGGCGGCTACTC   |
| XPC-low     | GCTGCTGCTTTCTTTTCCCTTTTG   |
| XPF-up      | TCCCGTGCTTCTGATTGAGTTTGA   |
| XPF-low     | AGGGCTGCTAATTCTGCGATGTTC   |
| XPG-up      | AAGAAGCAGCAGCCAGCGAAATAG   |
| XPG-low     | AAACACAGATCTGGCGGTCACGAG   |
| POLH-up     | CTGCCTCTGCCCCTTCATCTTCTACA |
| POLH-low    | TTGGATTTGGGGTTGCTTTCTGAGTC |
| p21-up      | GTGGGGGCATCATCAAAACTT      |
| p21-low     | CTCCCCCATCATATACCCCTAACA   |
| gapdh-up    | GGTGAAGAGTGGGAGTTGCTGTTGA  |
| gapdh-low   | CCCCTCTGGAAAGCTGTGGCGTGAT  |

**Suppl. Table. 1A: Endpoint-PCR Primers**

| <b>gene</b>             | <b>Primer sequence</b>  |
|-------------------------|-------------------------|
| gapdh-real-up           | CATGAGAAGTATGACAACAG    |
| gapdh-real-low          | ATGAGTCCTTCCACGATA      |
| $\beta$ -actin-real-up  | TGGCATCCACGAAACTACC     |
| $\beta$ -actin-real-low | GTGTTGGCGTACAGGTCTT     |
| POLH-real-up            | ATCTTCTACTGGCACAAG      |
| POLH-real-low           | ACATTATCTCCATCACTTCA    |
| P21-real-up             | TACATCTTCTGCCTTAGT      |
| P21-real-low            | TCTTAGGAACCTCTCATT      |
| CSA-real-up             | GGATTGAAATTCACGTCT      |
| CSA-real-low            | TTATCTGTTCTCCTGAGTAA    |
| CSB-real-up             | GAAGAAGCAAGGTTGTAA      |
| CSB-real-low            | CTTTCTTGTTTGGTTTGT      |
| DDB1-real-up            | GTCACTCTCAAGGATCTC      |
| DDB1-real-low           | AACACAACACCATTATCAAG    |
| DDB2-real-up            | TGTAGCCTGGATGTGTTCT     |
| DDB2-real-low           | GCATTCTGAGATTCCAAAGC    |
| XPA-real-up             | AAGGAAGTCCGACAGGAA      |
| XPA-real-low            | ACACGCTGCTTCTTACTG      |
| XPB-real-up             | CAGTGACATCACCGAGTA      |
| XPB-real-low            | GCTGACAGTACACAACCTAA    |
| XPC-real-up             | ACACCTACTACCTCTCAA      |
| XPC-real-low            | TAAATAGCAAATCTCCTTTCC   |
| XPD-real-up             | AGAGATTGAGAAGGTGATTGAAG |
| XPD-real-low            | AGAGCCAGTCCCAGAAAC      |
| XPF-real-up             | GGTTGACTTCTTGACTGATA    |
| XPF-real-low            | AGATGAATGCTTCTTGACA     |
| XPG-real-up             | CAGTTCAGAAGAGGAAGATG    |
| XPG-real-low            | TCTATCGCTTGAGGATTATGA   |
| POLH-ChiP-up            | GAGCTCGAGAAATCAAGGCT    |
| POLH-ChiP-low           | AAATCTGGAACCATCACGCT    |

**Suppl. Table. 1B: qRT-PCR Primers**

| <b>Epitope</b>       | <b>Antibody</b>                                                              |
|----------------------|------------------------------------------------------------------------------|
| XPF                  | ab-5 (clone 51, NeoMarkers, Thermo Fisher Scientific)                        |
| XPG                  | sc-13563 (8H7, Santa Cruz Biotechnology)                                     |
| $\beta$ -Actin       | sc-47778 (C4, Santa Cruz Biotechnology)                                      |
| HSP90                | sc-13119 (F-8, Santa Cruz Biotechnology)                                     |
| POLH                 | ab17725 (Abcam, Cambridge, UK)                                               |
| p53                  | sc-100 (Pab 246, Santa Cruz Biotechnology)                                   |
| DDB2                 | Kind gift from Vesna Ropic-Otrin, University of Pittsburgh, Cancer Institute |
| XPC                  | ab6264 (Abcam Cambridge, UK)                                                 |
| p53-Ser15            | #9286 (Cell Signaling Technology)                                            |
| p53-Ser46            | #2521 (Cell Signaling Technology)                                            |
| p21                  | ab7960 (Abcam, Cambridge, UK)                                                |
| NOXA                 | ab13687 (Abcam, Cambridge, UK)                                               |
| $\gamma$ H2AX-Ser139 | JBW301 (Millipore) for IF                                                    |
| $\gamma$ H2AX-Ser139 | #05-164 (Upstate) for WB                                                     |
| c-FOS                | sc-52 (Santa Cruz Biotechnology) for EMSA                                    |
| c-JUN                | sc-45 (Santa Cruz Biotechnology) for EMSA                                    |
| pc-FOS               | #5348S (Cell Signaling Technology)                                           |
| pc-JUN               | #3270S (Cell Signaling Technology)                                           |

**Suppl. Table. 2: Antibodies**
