# Supplementary figures and images for: Adaptive upregulation of DNA repair genes following benzo(a)pyrene diol epoxide protects against cell death at the expense of mutations
Source: PubMed Central journal article supplement — Nucleic Acids Res. 2016 Sep 30;44(22):10727–43. doi: 10.1093/nar/gkw873 (PMC5159553; doi:10.1093/nar/gkw873), 2016-09-30

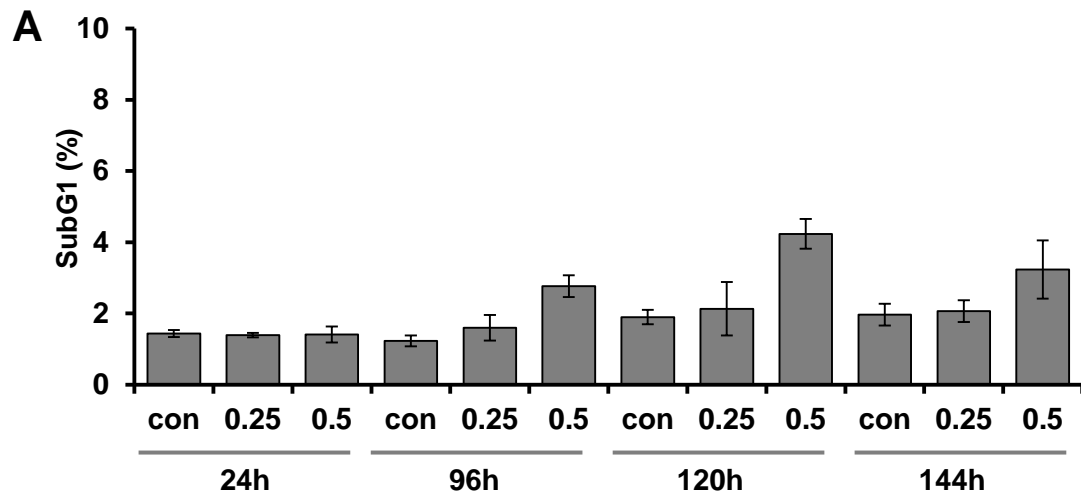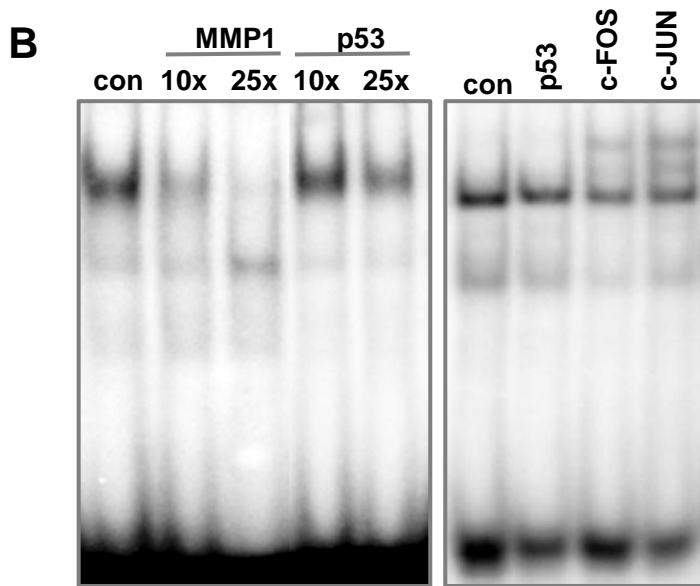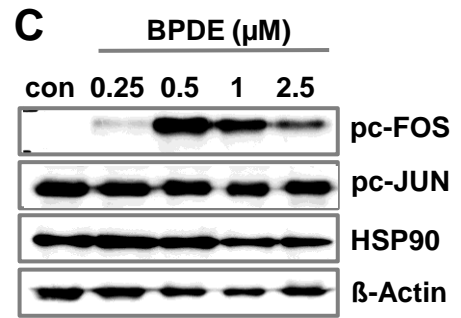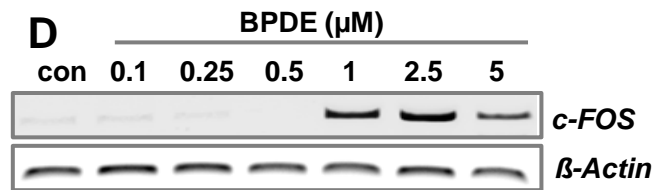

Suppl. Fig. 1

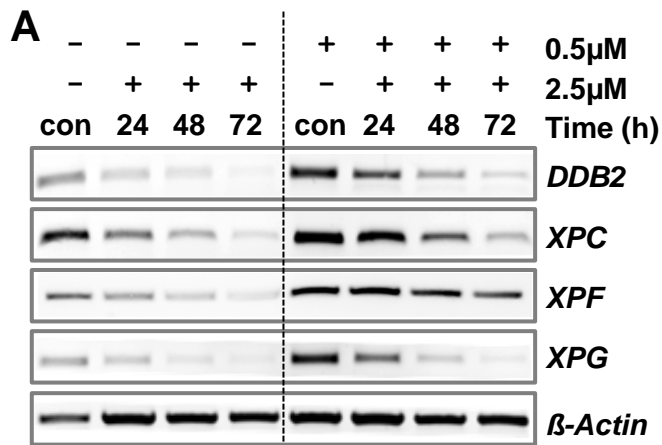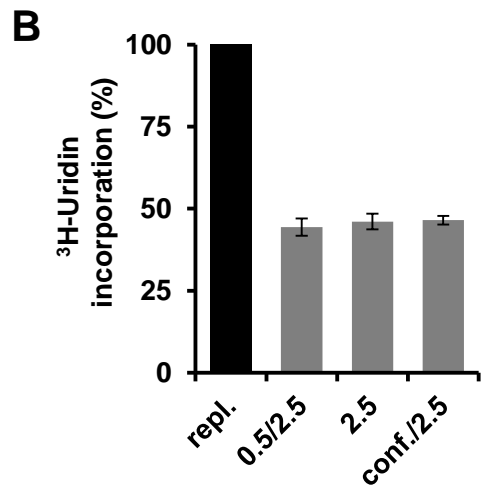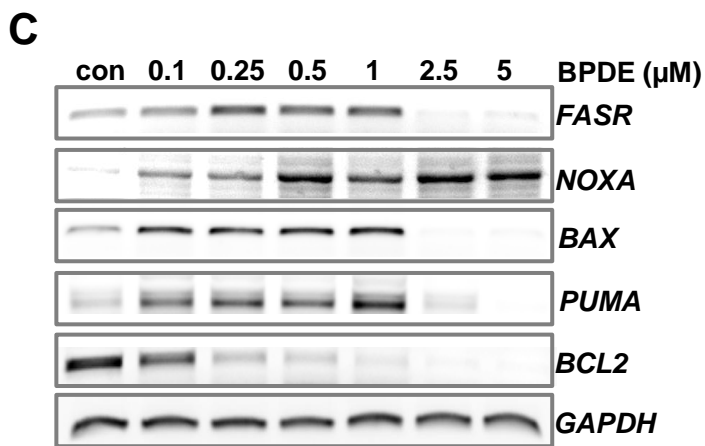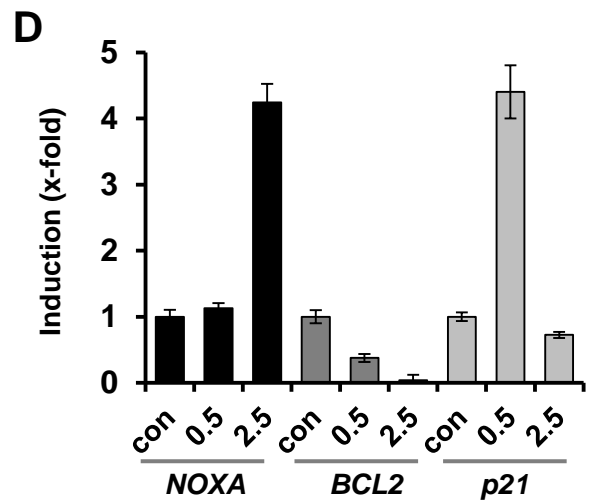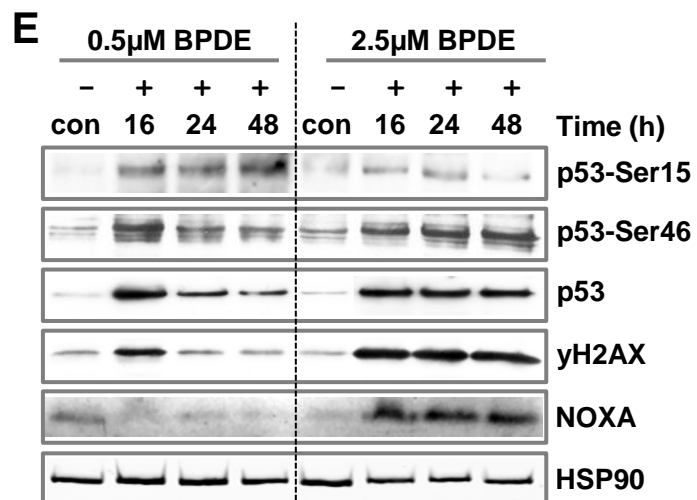

Suppl. Fig. 2

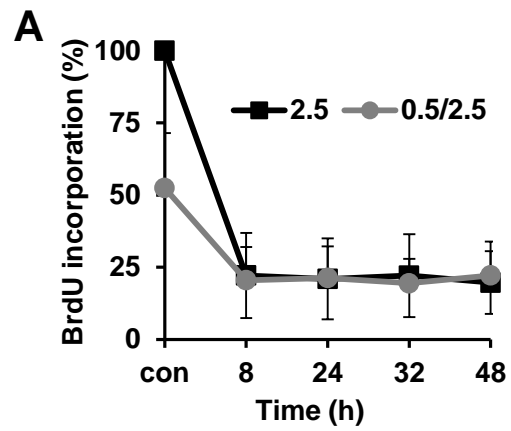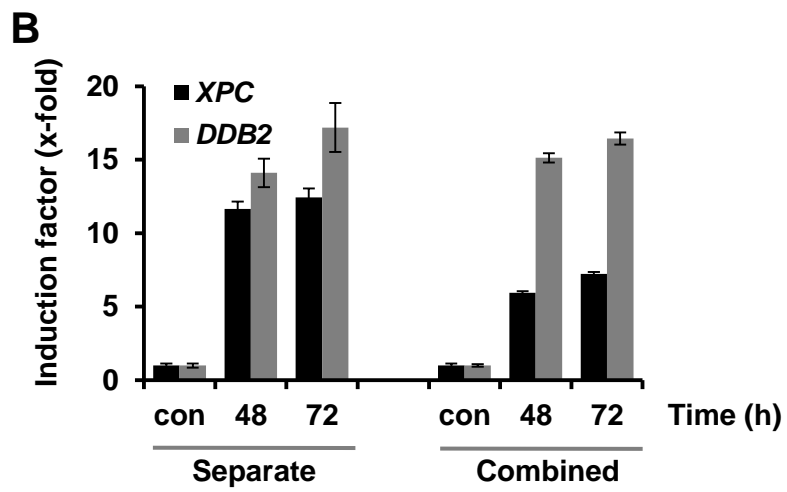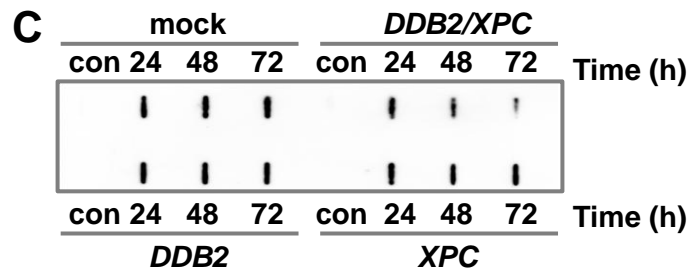

Suppl. Fig. 3

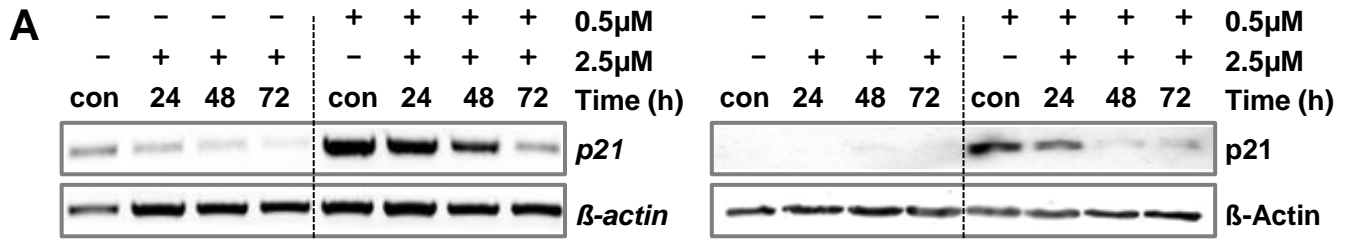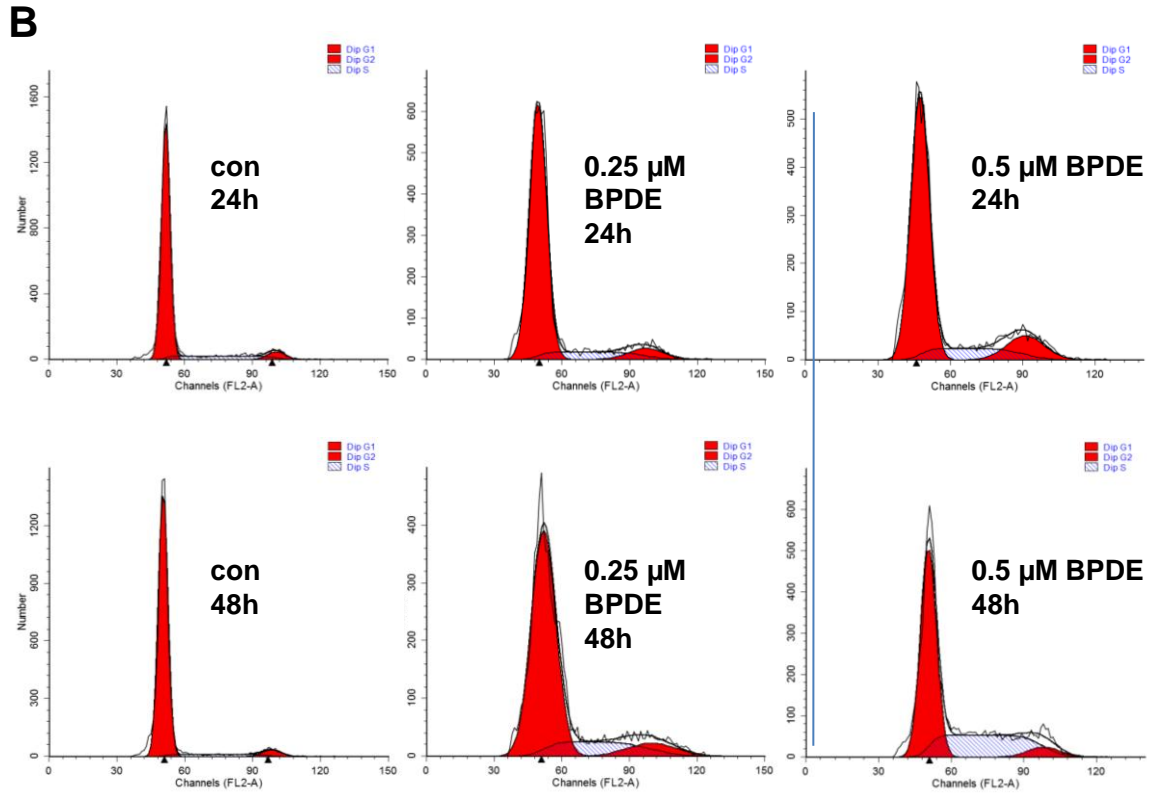

Suppl. Fig. 4

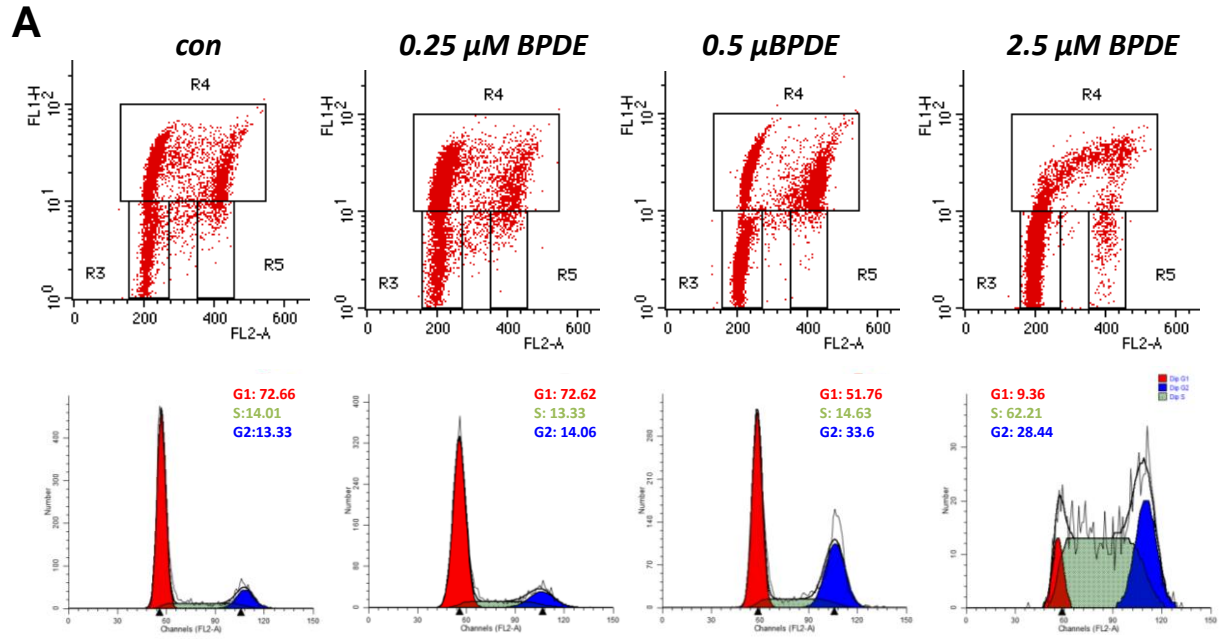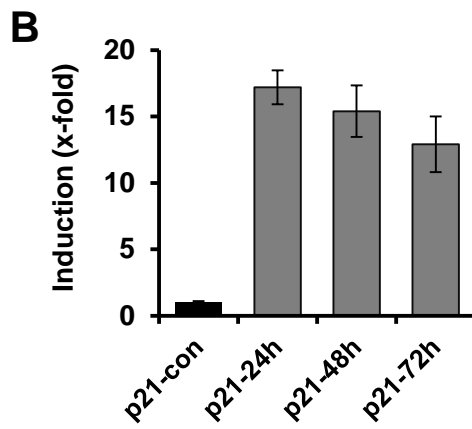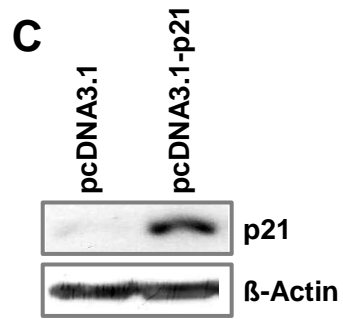

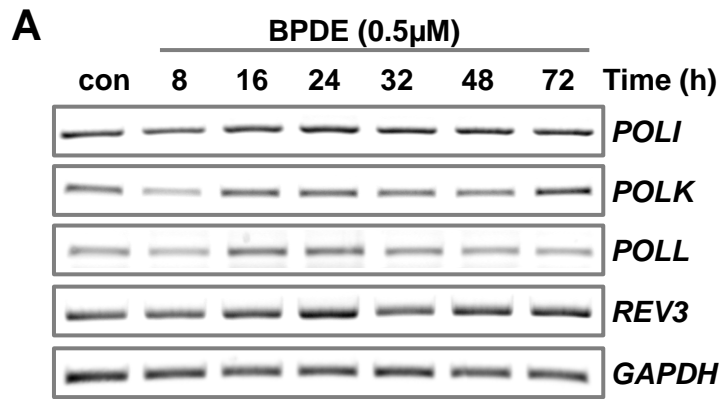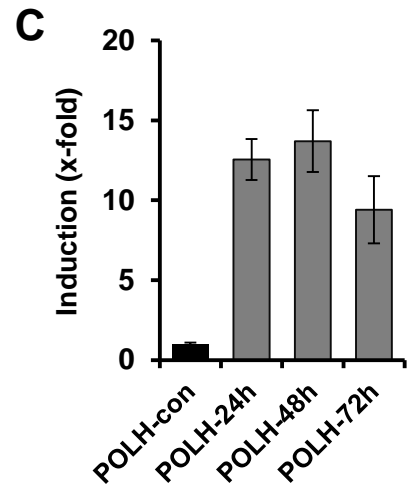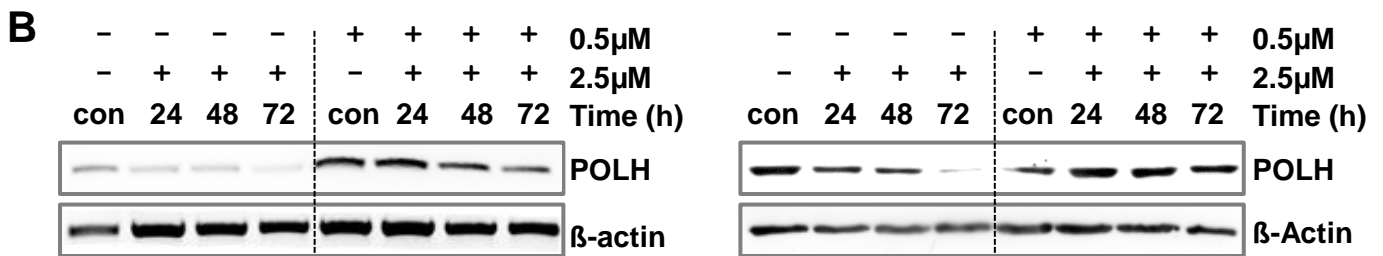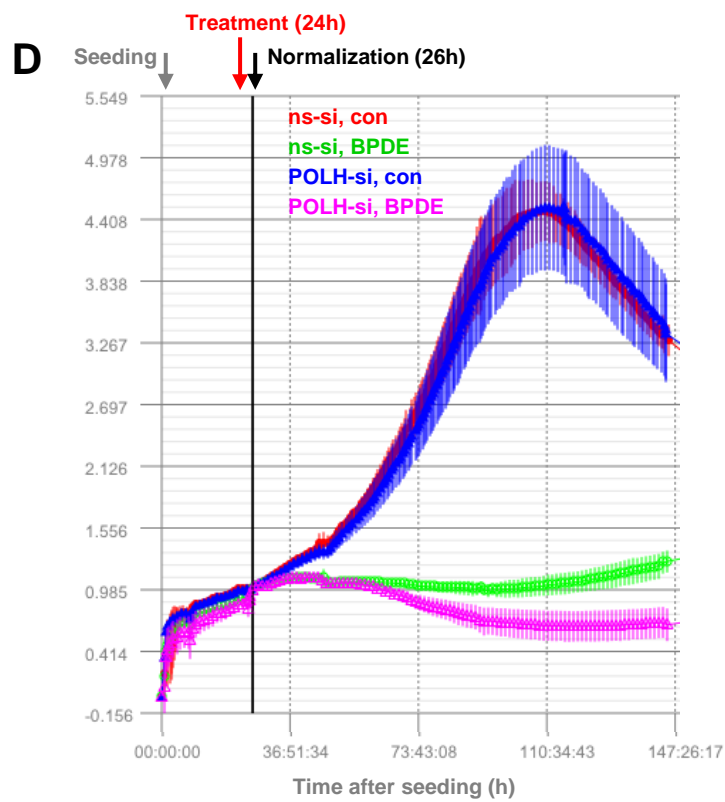

Suppl. Fig. 6

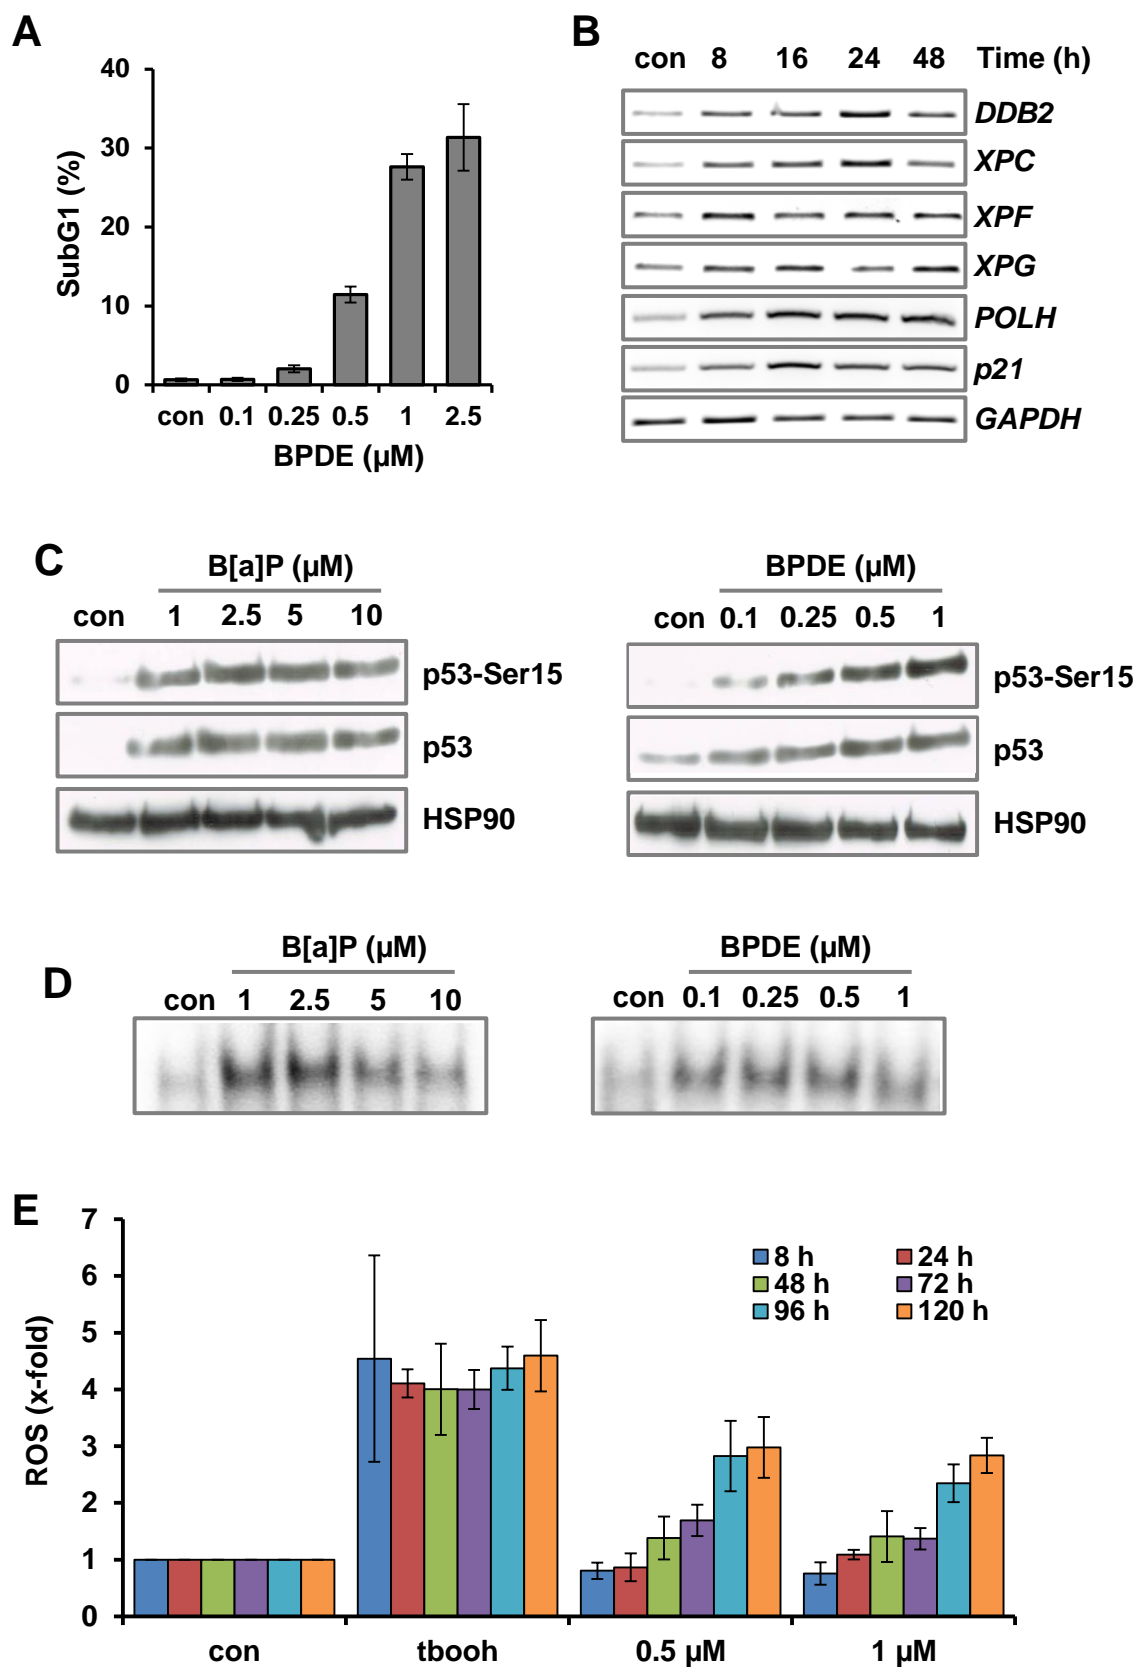

Suppl. Fig. 7

Supplement: supp_gkw873_nar-00726-d-2016-File011.pdf [file supp_gkw873_nar-00726-d-2016-File011.pdf]
